# Supplementary material
Source: publisher site journal article supplement (https://www.dovepress.com/article/268556)
Supplement: Supplementary file 1 [file get_supplementary_file.php]

*Supplementary data for the manuscript entitled:*

## **Reproductive factors, use of exogenous hormones and the rate of pancreatic cancer incidence: the Norwegian Women and Cancer Study**

Antoine Alvarez<sup>1</sup>, Kristin Benjaminsen Borch<sup>2</sup>, Charlotta Rylander<sup>2</sup>

<sup>1</sup>Faculty of Medicine, Paris-Sud University, Paris, France

<sup>2</sup>Department of Community Medicine, Faculty of Health Sciences, UiT The Arctic University of Norway, Tromsø, Norway

**Supplementary table 1:** Hazard ratios (HR) and 95% confidence intervals (CI) for the association between cumulative breastfeeding duration (months) and the rate of pancreatic cancer incidence stratified by smoking status. The Norwegian Women and Cancer study.

|                                                      |            | Age-adjusted models |              |                   |         | Multivariable adjusted models |              |                   |         |
|------------------------------------------------------|------------|---------------------|--------------|-------------------|---------|-------------------------------|--------------|-------------------|---------|
|                                                      |            | n cases=            | Person years | HR (95% CI)       | P trend | n cases=                      | Person years | HR (95% CI)       | P trend |
| Never smokers                                        |            |                     |              |                   |         |                               |              |                   |         |
| <b>Cumulative breastfeeding duration<sup>a</sup></b> |            |                     |              |                   |         |                               |              |                   |         |
| (months)                                             | 0          | 28                  | 143,935      | Ref.              |         | 22                            | 143,934      | Ref.              |         |
|                                                      | 1-6        | 21                  | 147,536      | 0.70 (0.38; 1.27) |         | 18                            | 147,536      | 0.55 (0.25; 1.22) |         |
|                                                      | 7-12       | 18                  | 156,500      | 0.56 (0.30; 1.05) |         | 17                            | 156,500      | 0.51 (0.23; 1.15) |         |
|                                                      | 13-18      | 19                  | 126,075      | 0.79 (0.43; 1.45) |         | 17                            | 126,076      | 0.70 (0.31; 1.61) |         |
|                                                      | 19-24      | 17                  | 90,406       | 1.05 (0.56; 1.99) |         | 14                            | 90,406       | 0.90 (0.38; 2.14) |         |
|                                                      | ≥25        | 11                  | 133,966      | 0.45 (0.22; 0.92) | 0.22    | 9                             | 133,966      | 0.41 (0.15; 1.11) | 0.60    |
|                                                      | Per month: | 114                 | 829,579      | 0.99 (0.97; 1.01) |         | 97                            | 713,304      | 0.99 (0.97; 1.01) |         |
| Ever smokers                                         |            |                     |              |                   |         |                               |              |                   |         |
| <b>Cumulative breastfeeding duration<sup>a</sup></b> |            |                     |              |                   |         |                               |              |                   |         |
| (months)                                             | 0          | 58                  | 249,662      | Ref.              |         | 51                            | 249,662      | Ref.              |         |
|                                                      | 1-6        | 101                 | 380,148      | 1.26 (0.87; 1.82) |         | 87                            | 380,148      | 0.98 (0.61; 1.60) |         |
|                                                      | 7-12       | 73                  | 325,748      | 1.06 (0.72; 1.55) |         | 63                            | 325,748      | 0.80 (0.48; 1.33) |         |
|                                                      | 13-18      | 38                  | 201,286      | 0.91 (0.58; 1.41) |         | 35                            | 201,286      | 0.73 (0.42; 1.27) |         |
|                                                      | 19-24      | 30                  | 121,609      | 1.22 (0.76; 1.96) |         | 26                            | 121,609      | 0.90 (0.49; 1.63) |         |
|                                                      | ≥25        | 17                  | 128,977      | 0.62 (0.35; 1.96) | 0.046   | 15                            | 128,977      | 0.40 (0.20; 0.80) | 0.006   |
|                                                      | Per month: | 317                 | 1,435,907    | 0.98 (0.97; 1.00) |         | 277                           | 1,245,748    | 0.97 (0.96; 0.99) |         |

**Notes: Abbreviations:** HR, Hazard Ratio; CI, Confidence Interval; OC, Oral Contraceptive

**Age adjusted (crude) model:** adjusted for age and sub-cohort (enrolled 1991-1992, born 1943-65 / enrolled 1996-1997, born 1927-1942 / enrolled 1996-1997, born 1943-65 / enrolled 2003-2008, born 1943-1965).

**Adjusted models:**

a: adjusted for education, number of children and oral contraceptive use

**Supplementary table 2:** Hazard ratios (HR) and 95% confidence intervals (CI) for the association between age at first birth and the rate of pancreatic cancer incidence stratified by smoking status. The Norwegian women and cancer study.

|                                       |           | Age-adjusted models |              |                   |         | Multivariable adjusted models |              |                   |         |
|---------------------------------------|-----------|---------------------|--------------|-------------------|---------|-------------------------------|--------------|-------------------|---------|
| Never smokers                         |           | n cases=            | Person years | HR (95% CI)       | P trend | n cases=                      | Person years | HR (95% CI)       | P trend |
| <b>Age at first birth<sup>a</sup></b> |           |                     |              |                   |         |                               |              |                   |         |
| (years)                               | ≤19       | 7                   | 79,246       | 0.59 (0.27, 1.30) |         | 7                             | 79,245       | 0.65 (0.29, 1.42) |         |
|                                       | 20-24     | 67                  | 435,146      | Ref.              |         | 61                            | 435,146      | Ref.              |         |
|                                       | 25-29     | 43                  | 320,370      | 0.94 (0.64; 1.38) |         | 37                            | 320,370      | 0.90 (0.59; 1.37) |         |
|                                       | ≥30       | 13                  | 121,963      | 0.81 (0.45; 1.47) | 0.93    | 11                            | 121,963      | 0.76 (0.39; 1.46) | 0.68    |
|                                       | Per year: | 130                 | 988,562      | 1.00 (0.96; 1.04) |         | 116                           | 858,408      | 0.99 (0.94; 1.03) |         |
| Ever smokers                          |           |                     |              |                   |         |                               |              |                   |         |
| <b>Age at first birth<sup>a</sup></b> |           |                     |              |                   |         |                               |              |                   |         |
| (years)                               | ≤19       | 73                  | 290,802      | 1.19 (0.91, 1.55) |         | 63                            | 290,802      | 1.17 (0.88, 1.57) |         |
|                                       | 20-24     | 203                 | 136,434      | Ref.              |         | 176                           | 861,984      | Ref.              |         |
|                                       | 25-29     | 86                  | 69,496       | 0.86 (0.67; 1.11) |         | 78                            | 434,546      | 0.92 (0.70; 1.21) |         |
|                                       | ≥30       | 28                  | 29,031       | 0.75 (0.51; 1.12) | 0.019   | 27                            | 176,235      | 0.86 (0.57; 1.30) | 0.161   |
|                                       | Per year: | 390                 | 1,790,891    | 0.96 (0.94; 0.98) |         | 344                           | 1,567,379    | 0.97 (0.94; 1.00) |         |

**Notes:**

**Age adjusted (crude) model:** adjusted for age and sub-cohort (enrolled 1991-1992, born 1943-65 / enrolled 1996-1997, born 1927-1942 / enrolled 1996-1997, born 1943-65 / enrolled 2003-2008, born 1943-1965)

**Adjusted models:**

a: Adjusted for age, education and OC use

**Abbreviations:** HR, Hazard Ratio; CI, Confidence Interval; OC, Oral Contraceptive

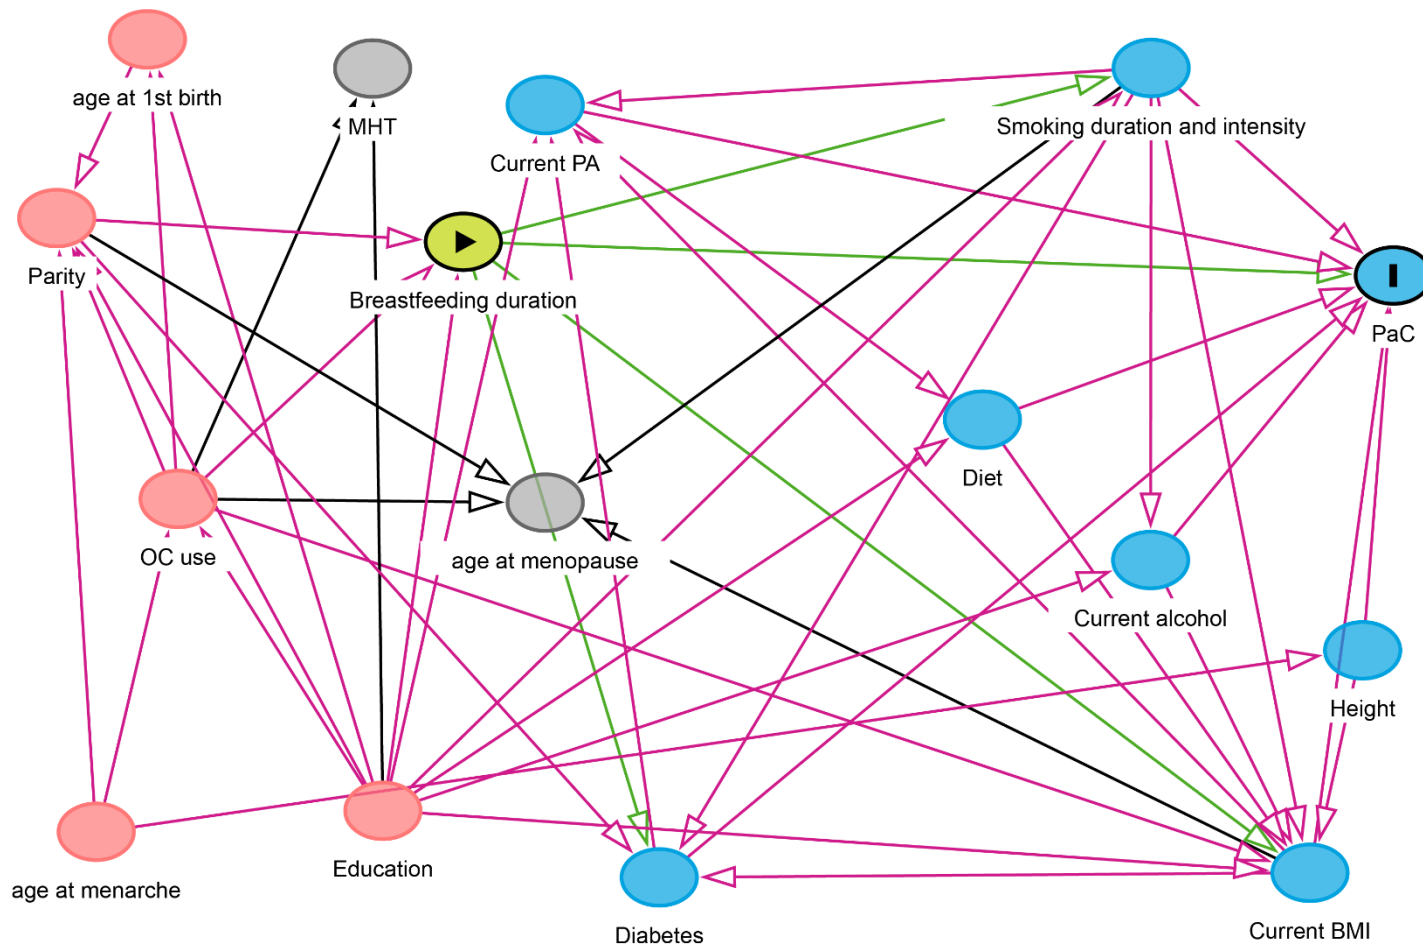

**Supplementary figure1:** Directed acyclic graph depicting the assumed relations between cumulative breastfeeding duration, pancreatic cancer incidence and covariates. The figure is created from <https://dagitty.net>

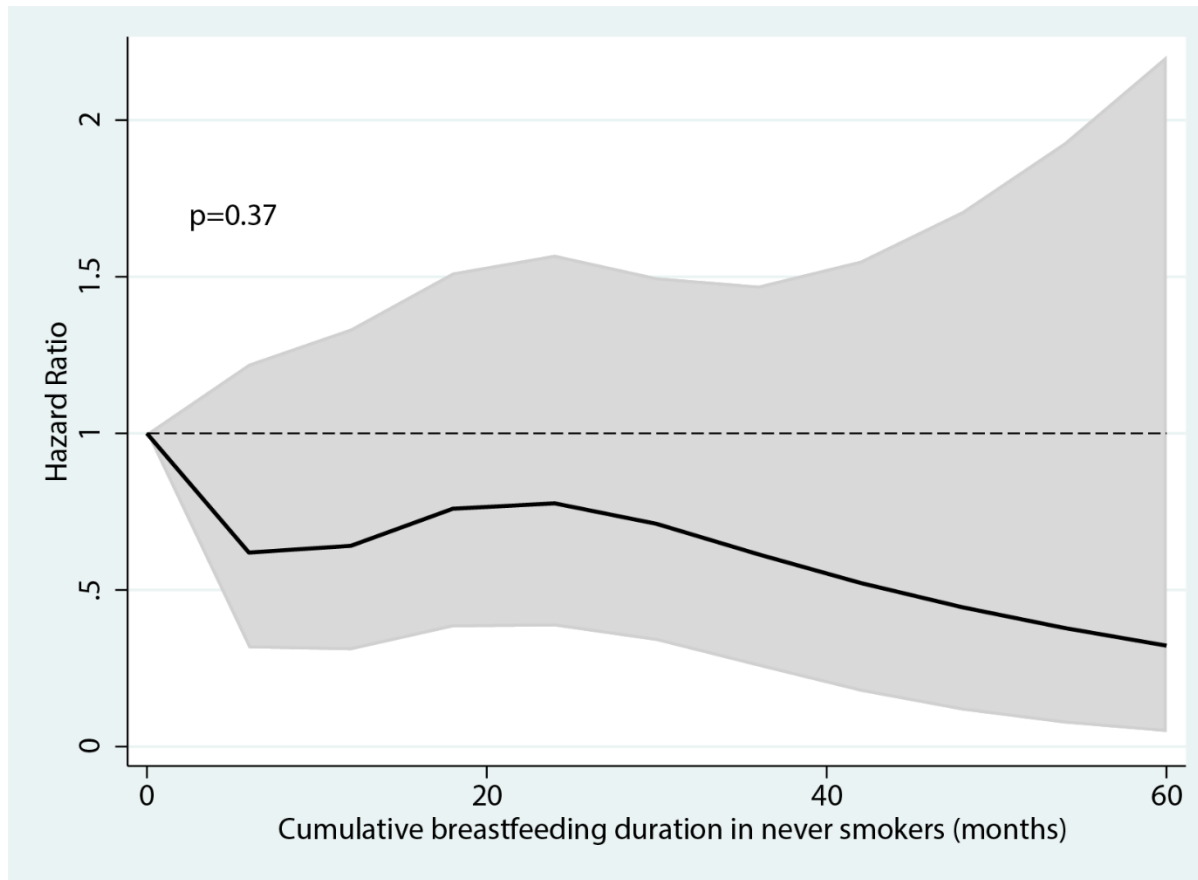

**Supplementary figure 2:** The association between cumulative breastfeeding duration and rate of pancreatic cancer incidence in never smokers. Cumulative breastfeeding duration is modelled in continuous scale using restricted cubic splines with 4 knots. The p-value corresponds to the null hypothesis that the regression coefficients for the second and third spline coefficient equaled zero, i.e. a test of non-linearity.

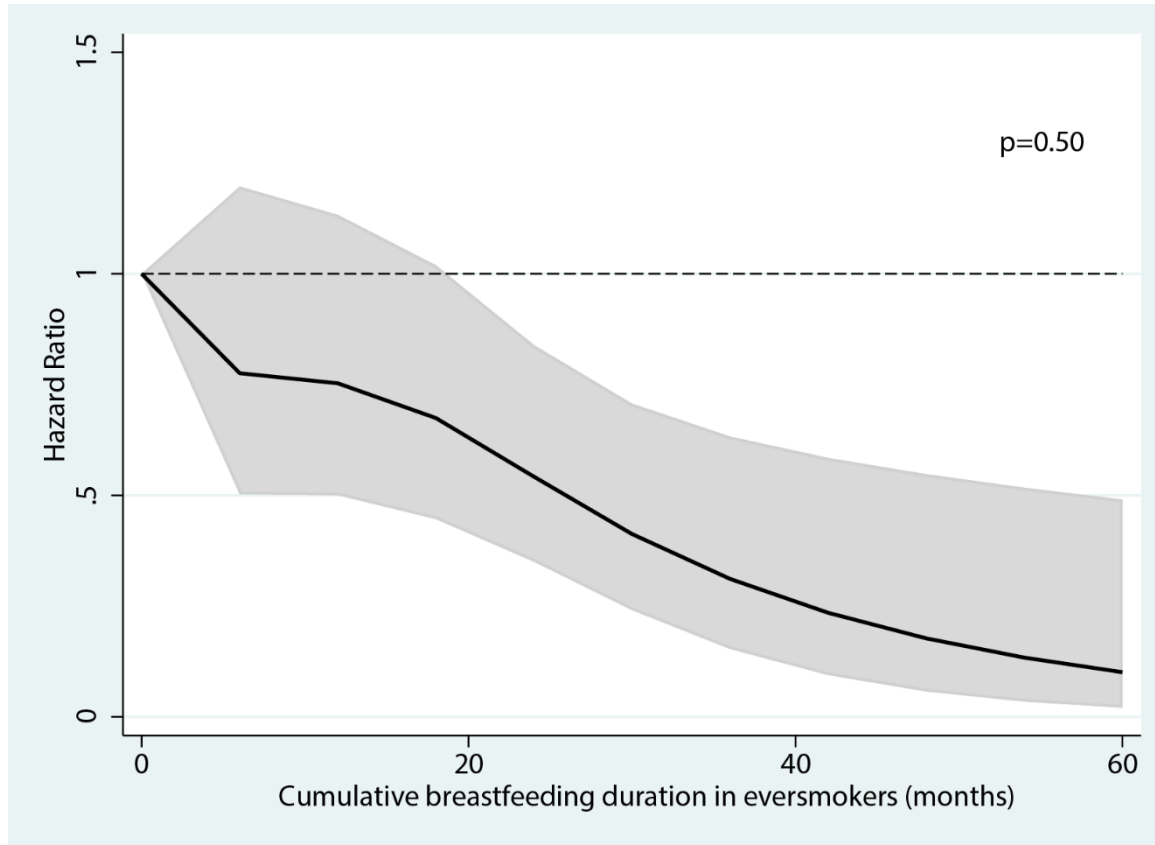

**Supplementary figure 3:** The association between cumulative breastfeeding duration and rate of pancreatic cancer incidence in ever smokers. Cumulative breastfeeding duration is modelled in continuous scale using restricted cubic splines with 4 knots. The p-value corresponds to the null hypothesis that the regression coefficients for the second and third spline coefficient equaled zero, i.e. a test of non-linearity.
